# Supplementary material for: In vitrostudies on the reaction rates of acrylamide with the key body-fluid thiolsl-cysteine, glutathione, and captopril
Source: Royal Society of Chemistry journal article supplement (doi:10.1039/c4tx00059e), 2014-07-17
Supplement: c4tx00059e2.pdf [file c4tx00059e2.pdf]

**Table 1:** Summary of experimental results: Calculated second-order rate constants ( $k$ ) and activation parameters for the reactions between acrylamide and *L*-cysteine, glutathione, and captopril

| <b>Parameter</b>                                        | <b><i>L</i>-Cysteine</b> | <b>Glutathione</b> | <b>Captopril</b>  |
|---------------------------------------------------------|--------------------------|--------------------|-------------------|
| $k/\text{dm}^3 \text{ mol}^{-1} \text{ s}^{-1}$ (293 K) | $0.21 \pm 0.01$          |                    |                   |
| $k/\text{dm}^3 \text{ mol}^{-1} \text{ s}^{-1}$ (298 K) | $0.27 \pm 0.02$          |                    |                   |
| $k/\text{dm}^3 \text{ mol}^{-1} \text{ s}^{-1}$ (303 K) | $0.34 \pm 0.02$          | $0.18 \pm 0.02$    | $0.13 \pm 0.01$   |
| $k/\text{dm}^3 \text{ mol}^{-1} \text{ s}^{-1}$ (310 K) |                          | $0.25 \pm 0.01$    | $0.163 \pm 0.003$ |
| $k/\text{dm}^3 \text{ mol}^{-1} \text{ s}^{-1}$ (315 K) |                          | $0.31 \pm 0.04$    | $0.19 \pm 0.01$   |
| $\Delta H^\ddagger/\text{kJ mol}^{-1}$                  | $34 \pm 5$               | $33 \pm 5$         | $22 \pm 7$        |
| $\Delta S^\ddagger/\text{J K}^{-1} \text{ mol}^{-1}$    | $-143 \pm 2$             | $-152 \pm 4$       | $-190 \pm 2$      |
| $\Delta G^\ddagger(298 \text{ K})/\text{kJ mol}^{-1}$   | $76 \pm 1$               | $78 \pm 4$         | $78 \pm 3$        |
