# Supplementary material for: In vitrostudies on the reaction rates of acrylamide with the key body-fluid thiolsl-cysteine, glutathione, and captopril
Source: Royal Society of Chemistry journal article supplement (doi:10.1039/c4tx00059e), 2014-07-17
Supplement: c4tx00059e3.pdf [file c4tx00059e3.pdf]

**Table 2:** Measurements ( $\text{\AA}/\text{deg}$ ) for Potential Hydrogen-Bonding in calculated Transition State structures for the solvated *L*-cysteine, captopril, and glutathione adducts of acrylamide <sup>a</sup>

| Measure | <i>L</i> -cysteine-acrylamide | Captopril-acrylamide | Glutathione-acrylamide |
|---------|-------------------------------|----------------------|------------------------|
|         | water                         | water                | water                  |
| O••H••X | 2.470                         | 2.785                | 2.123                  |
|         | 2.883                         |                      | 2.066                  |
|         | 2.664                         |                      | 1.788                  |
|         | 2.657                         |                      | 1.880                  |
|         |                               |                      | 1.627                  |

## References

1. G. A. Jeffrey and S. Takagi, *Accounts of Chemical Research*, 1978, **11**, 264-270.
2. C. L. Perrin and J. B. Nielson, *Annu. Rev. Phys. Chem.* , 1997, **48**, 511-544.

---

<sup>a</sup> Hydrogen bond length is  $\leq 2.5 \text{\AA}$

1. G. A. Jeffrey and S. Takagi, *Accounts of Chemical Research*, 1978, **11**, 264-270, 2.  
C. L. Perrin and J. B. Nielson, *Annu. Rev. Phys. Chem.* , 1997, **48**, 511-544.
